# Supplementary material for: The impact of disease severity adjustment on hospital standardised mortality ratios: Results from a service-wide analysis of ischaemic stroke admissions using linked pre-hospital, admissions and mortality data
Source: PubMed Central journal article supplement (PMC6528964; doi:10.1371/journal.pone.0216325), 2019-05-21
Supplement: pone.0216325.s003.pdf [file pone.0216325.s003.pdf]

**S3 Appendix: Cross-validation of risk-adjusted models.\***

| <b>Model</b>                                                                               | <b>Akaike<br/>Information<br/>Criterion</b> | <b>Nagelkerke r<sup>2</sup></b> | <b>c-statistic<br/>95% CI</b> | <b>Brier Score</b> |
|--------------------------------------------------------------------------------------------|---------------------------------------------|---------------------------------|-------------------------------|--------------------|
| <i>Standard Models</i>                                                                     |                                             |                                 |                               |                    |
| Model 1: Base+Comorbidities**                                                              | 13,309                                      | 0.17                            | 0.75 (0.74-0.76)              | 0.12               |
| Model 2: Base+Comorbidities+Stroke Severity                                                | 11,580                                      | 0.32                            | 0.83 (0.82-0.84)              | 0.10               |
| <i>Enhanced models</i>                                                                     |                                             |                                 |                               |                    |
| Model 1: Base+Comorbidities+Arrival mode <sup>†</sup> +Most<br>urgent ED triage category   | 12,482                                      | 0.24                            | 0.79 (0.78-0.80)              | 0.11               |
| Model 2: Base+Comorbidities+Stroke severity+Most<br>urgent ED triage category <sup>‡</sup> | 11,494                                      | 0.32                            | 0.83 (0.82-0.84)              | 0.10               |

\*Models were cross-validated with an external data-set applying the same selection criteria used to derive data for the main study period. The external data-set comprised three years of linked administrative data recording information about 17,339 ischaemic stroke patients from July 1, 2008 to June 30, 2011. \*\*Base variables are: Age, age\*age, sex, year of admission, prior stroke and a measure of socio-economic status based on patient location of residence. Comorbidities include Charlson comorbidities+Atrial Fibrillation; <sup>†</sup>Ambulance or private transport; <sup>‡</sup>Note: Stroke severity measure for Model 2 incorporates arrival mode.
