# Supplementary material for: The impact of disease severity adjustment on hospital standardised mortality ratios: Results from a service-wide analysis of ischaemic stroke admissions using linked pre-hospital, admissions and mortality data
Source: PubMed Central journal article supplement (PMC6528964; doi:10.1371/journal.pone.0216325), 2019-05-21
Supplement: pone.0216325.s004.pdf [file pone.0216325.s004.pdf]

**S4 Appendix: Change in outlier status of comorbidity adjusted HSMRs with and without stroke severity adjustment (Enhanced models)**

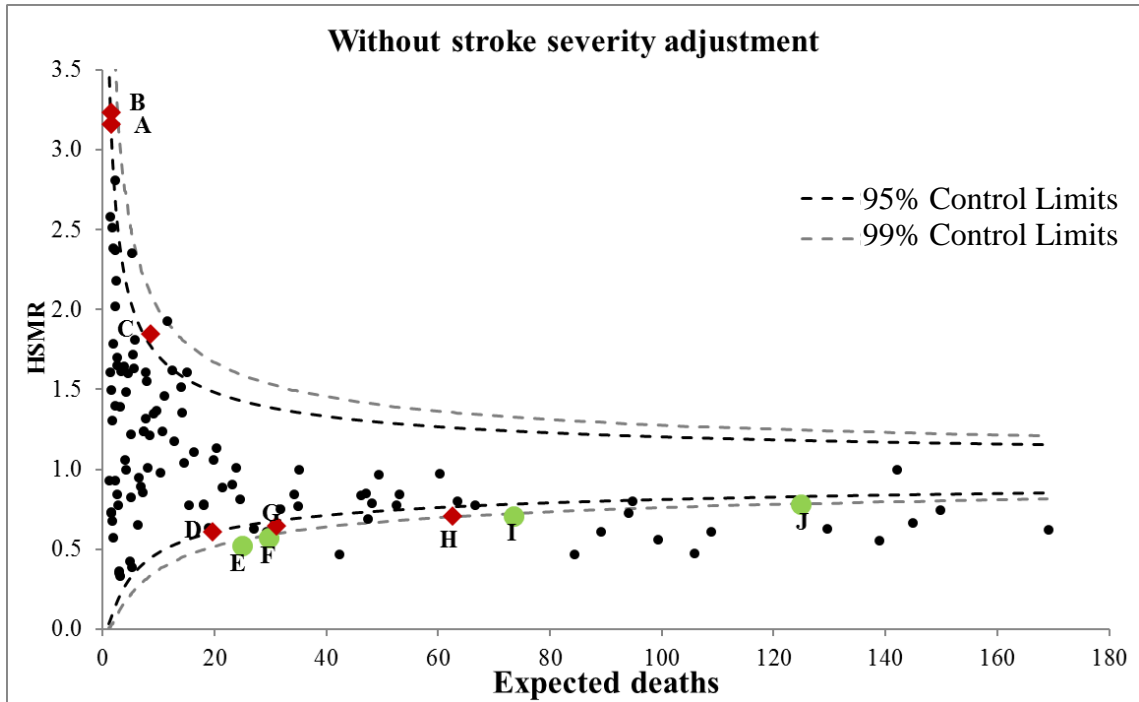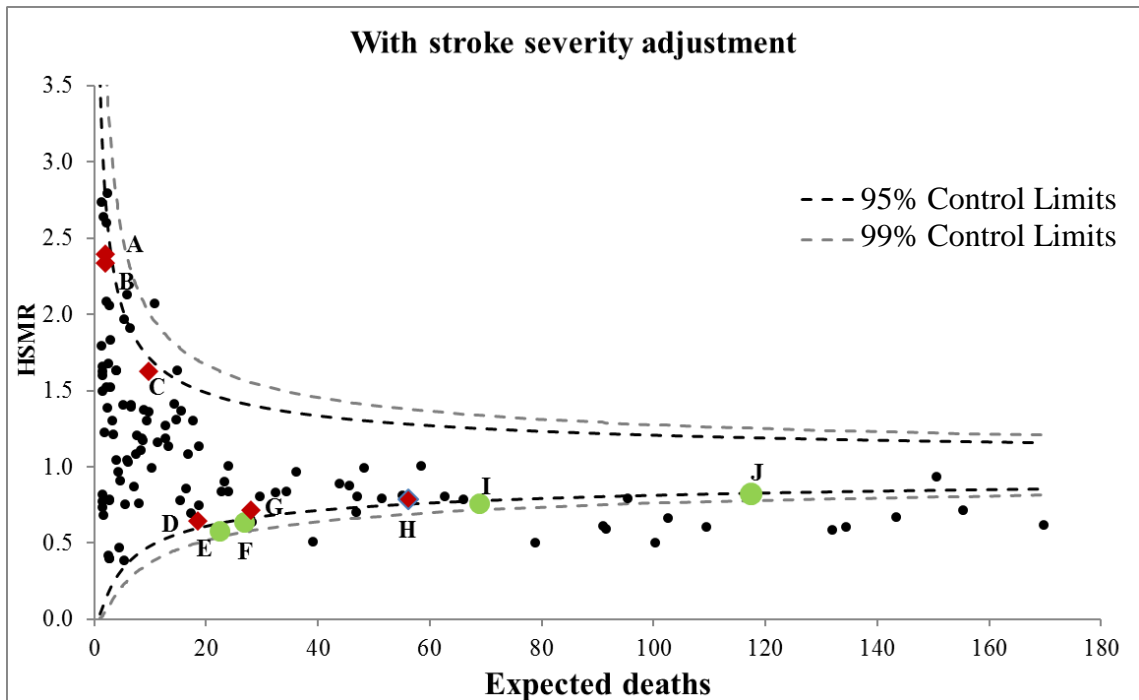

**Legend**

- ◆ Stroke severity adjustment changes health service from an outlier to a non-outlier
- Alert signal “downgraded” from an 99% to 95% control limit outlier with stroke severity adjustment.
